# Supplementary material
Source: Springer Nature journal article supplement (https://www.springermedizin.de/resource/supplementary/13019_2011_494_MOESM4_ESM.pdf/9638430)

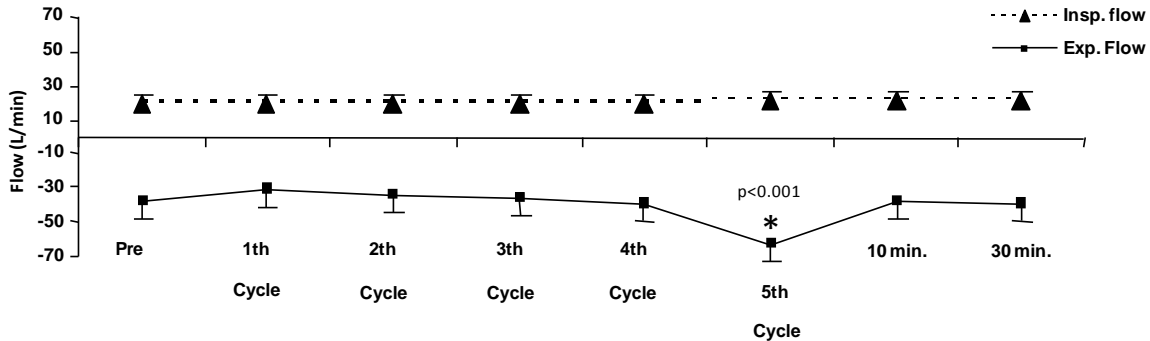

Insp. flow: Inspiratory flow; Exp. flow: expiratory flow.

Supplement: MOESM4 [file 9638430]
